# Supplementary material for: FGF1 protects neuroblastoma SH-SY5Y cells from p53-dependent apoptosis through an intracrine pathway regulated by FGF1 phosphorylation
Source: PubMed Central journal article supplement (PMC5596585; doi:10.1038/cddis.2017.404), 2017-08-31
Supplement: cddis2017404x1.pdf [file cddis2017404x1.pdf]

# Supplementary Figure 1 - Regulation of alternative 1A, 1B, 1C and 1D *fgf1* mRNA levels by rFGF1 or etoposide in SH-SY5Y and N2a cells

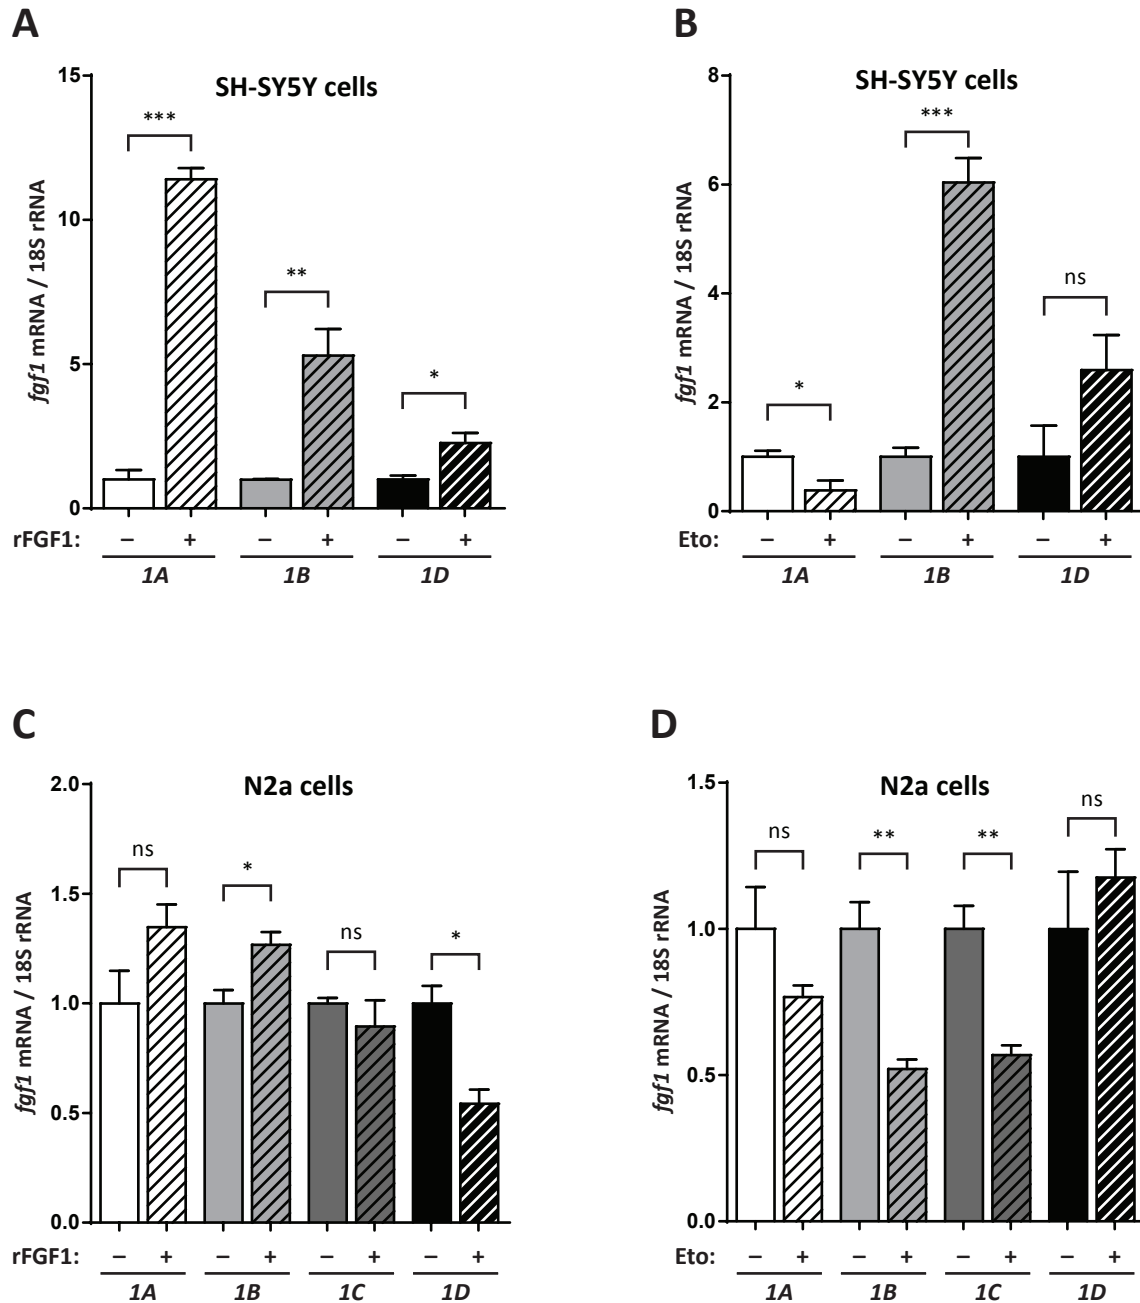

SH-SY5Y and N2a cells were treated or not with rFGF1 for 72h (A-C) or etoposide for 16h (B-D). Alternative 1A, 1B, 1C and 1D *fgf1* mRNA levels were analyzed by RT-PCR using specific primers described in supplementary Table 1. The 18S rRNA levels were used as a control for quantifications. The graphs represent the mean +/- SEM of three independent experiments. Student's *t*-tests were performed (n=3; ns: p>0.05; \*: p≤0.05; \*\*: p≤0.01; \*\*\*: p≤0.001).
