# Supplementary material for: FGF1 protects neuroblastoma SH-SY5Y cells from p53-dependent apoptosis through an intracrine pathway regulated by FGF1 phosphorylation
Source: PubMed Central journal article supplement (PMC5596585; doi:10.1038/cddis.2017.404), 2017-08-31
Supplement: cddis2017404x2.pdf [file cddis2017404x2.pdf]

## Supplementary table 1 – Specific primers used for RT-PCR of alternative 1A, 1B, 1C and 1D *fgf1* mRNA

Primers used in murine N2a cell line

| Primer (5' → 3')                           | Sequence              | Size of amplified fragment (bp)    | Number of cycles |
|--------------------------------------------|-----------------------|------------------------------------|------------------|
| <b>Mouse <i>fgf1</i> Reverse (Exon 1)*</b> | TGTGATCTCCCCTTCAGCCAT | <i>Used for all amplifications</i> |                  |
| <b>Mouse <i>fgf1-1A</i> Forward</b>        | CTGCCACCACCCAGACAGGA  | 92                                 | 33               |
| <b>Mouse <i>fgf1-1B</i> Forward</b>        | CGGACTTCATTCCCGTCTTGT | 121                                | 28               |
| <b>Mouse <i>fgf1-1C</i> Forward</b>        | GAAGCAGGCACCAGGCAGAG  | 164                                | 35               |
| <b>Mouse <i>fgf1-1D</i> Forward</b>        | TGGATGCAGGATTTCAAAG   | 196                                | 35               |

Primers used in human SH-SY5Y cell line

| Primer (5' → 3')                           | Sequence              | Size of amplified fragment (bp)    | Number of cycles |
|--------------------------------------------|-----------------------|------------------------------------|------------------|
| <b>Human <i>fgf1</i> Reverse (Exon 1)*</b> | GGTGATTCCCCTTCAGCCAT  | <i>Used for all amplifications</i> |                  |
| <b>Human <i>fgf1-1A</i> Forward</b>        | AATCAGGGCATCGCCTCCTTT | 223                                | 46               |
| <b>Human <i>fgf1-1B</i> Forward</b>        | CACTCAGAGCTGCAGTAGCCT | 194                                | 37               |
| <b>Human <i>fgf1-1C</i> Forward</b>        | ACTTCTGCAGGGAAGCCAGC  | 88                                 | –                |
| <b>Human <i>fgf1-1D</i> Forward</b>        | AGCAGCACAATGTTTGGGCTA | 84                                 | 40               |

\* Reverse primers (human or murine) located in *fgf1* exon 1 were used for all amplifications in combination with one of four specific forward primers. The size of the resulting amplified fragments and the number of amplification cycles needed to detect them are indicated.
